# Supplementary material for: The cAMP Receptor Protein (CRP) of Vibrio mimicus Regulates Its Bacterial Growth, Type II Secretion System, Flagellum Formation, Adhesion Genes, and Virulence
Source: MDPI journal article supplement (doi:10.3390/ani14030437), 2024-01-29
Supplement: s1 [file s1]

## Supplementary Material

### **The cAMP Receptor Protein (CRP) of *Vibrio mimicus* Regulates its Bacterial Growth, Type II secretion system, Flagellum Formation, Adhesion Genes and Virulence**

Ziqi Tian <sup>1,†</sup>, Fei Xiang <sup>1,2,†</sup>, Kun Peng <sup>1</sup>, Zhenyang Qin <sup>1</sup>, Yang Feng <sup>1</sup>, Bowen Huang <sup>1</sup>,

Ping Ouyang <sup>1</sup>, Xiaoli Huang <sup>3</sup>, Defang Chen <sup>3</sup>, Weimin Lai <sup>1</sup>, Yi Geng <sup>1,\*</sup>

<sup>1</sup> College of Veterinary Medicine, Sichuan Agricultural University,  
Chengdu 611130, China

<sup>2</sup> Agricultural and Rural Bureau of Zhongjiang County, Deyang 618100, China

<sup>3</sup> Department of Aquaculture, Sichuan Agricultural University,  
Chengdu 611130, China

† These authors contributed to this work equally.

#### **\* Correspondence:**

Corresponding Author: Yi Geng

Address: Huimin Road No. 211, Chengdu, Sichuan Province, Chengdu 611130,  
China

Tel.: +86028-86291162

E-mail: gengyisicau@126.com

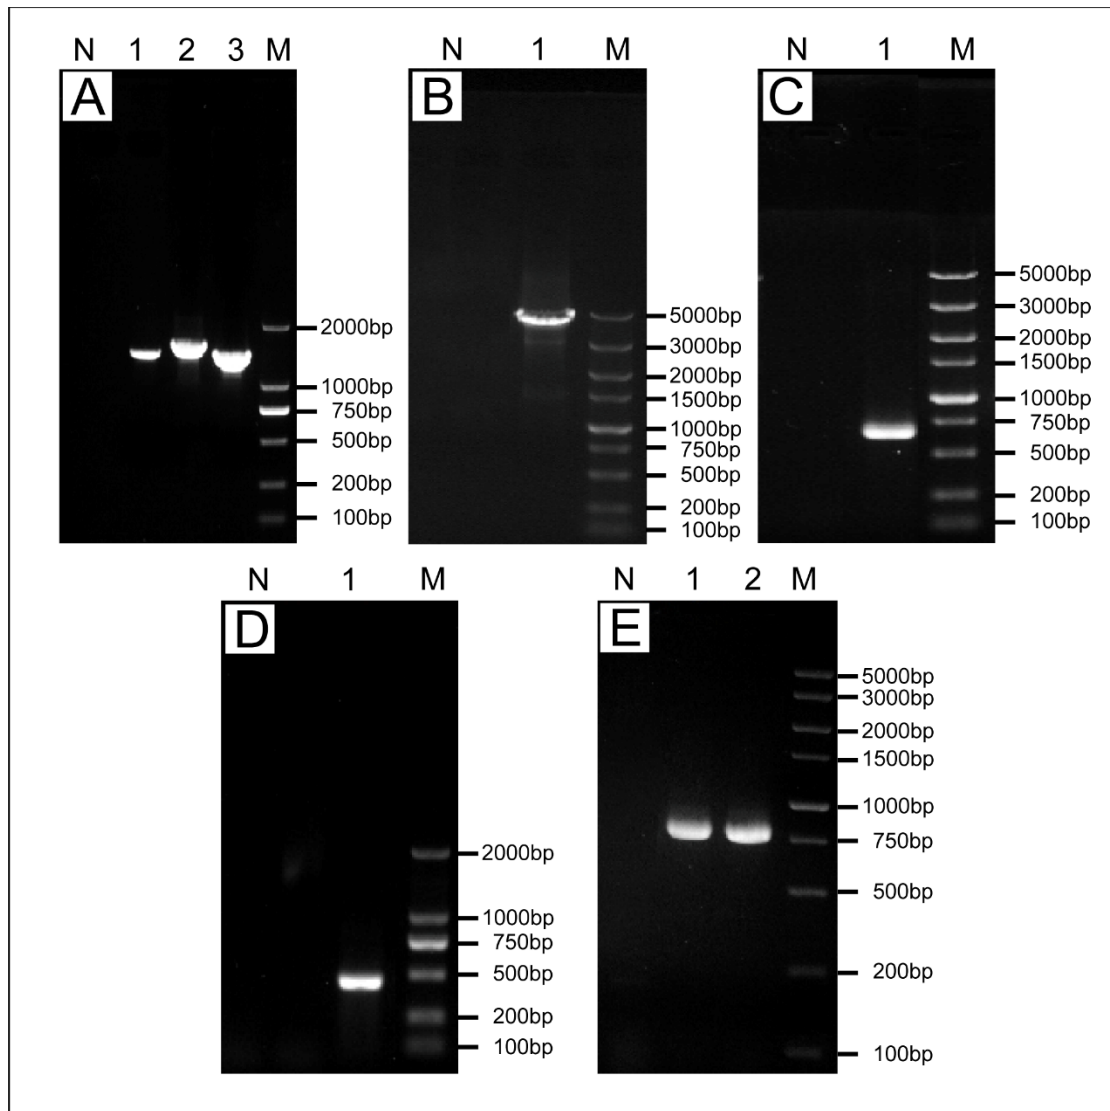

Fig S1. Construction and verification of the deletion and the complementation strains. A: Homologous recombination fragments amplified by primer pairs Up-F/R, Down-F/R and Kan<sup>r</sup>-F/R, respectively (1: Upstream homology arm fragment, 2: Kan<sup>r</sup> gene fragment, 3: Downstream homology arm fragment); B: Fusion fragment; C: Primer pair pKD46-F/R for identification of SCCF01/pKD46; D: Primer pair pCP20-F/R for identification of pCP20 plasmid; E: Primer pair pBAD24-F/R for identification of complementing strain; N: negative control; M: DNA Marker.

Table S1. Construction and detection Primers used in this study.

| Primer             | Primer sequences(forward/reverse,5'-3')         | Purpose                                                      |
|--------------------|-------------------------------------------------|--------------------------------------------------------------|
| Up                 | F: ATCCTCAATGCACAATCCCAT                        | Amplification of the 1378 bp                                 |
|                    | R: CGAAGCAGCTCCAGCCTACACTGCTTGTATCACACGGCAAC    | DNA fragment upstream of the 633 bp target deletion region   |
| Down               | F: ATTCATATGGACCATGGCTAAGCTATCCATATTTAGCGAAGCC  | Amplification of the 1347 bp                                 |
|                    | R: ACTCGACAATTGATCCGTGA                         | DNA fragment downstream of the 633 bp target deletion region |
| Kan <sup>r</sup>   | F: GTTGCCGTGTGATACAAGCAAGTGTAGGCTGGAGCTGCTTCG   | Creation of the 1489 bp                                      |
|                    | R: GGCTTCGCTAAAATATGGATAGCTTAGCCATGGTCCATATGAAT | deletion allele                                              |
| C- <i>crp</i>      | F: GCGGAATTCATGGTTCTAGGTAAACCTCAA               | Amplification of 651 bp <i>crp</i>                           |
|                    | R: CCCAAGCTTTAGCGAGTACCGTAAACCAC                | coding fragment                                              |
| <i>Crp</i>         | F: ACGTTATCCAATGGCGAATG                         | Amplicons of 381 and 934 bp                                  |
|                    | R: TACCGTGATCATGTGCACAG                         | for identification of $\Delta$ <i>crp</i> and WT strains     |
| <i>Crp</i> -RT-PCR | F: TAAACCTCAAACCGATCCAAC                        | Amplification of 223 bp for                                  |
|                    | R: TTCAAACAAGCCGAGTTCACC                        | identification of <i>crp</i> gene intragenic region          |
| pKD46              | F: ATGACACCGGACATTATCCTG                        | Amplicons of 649 bp for                                      |
|                    | R: TTTCAGCCAGTGCCTCGTC                          | identification of pKD46 plasmid recombinant strain           |
| pCP20              | F: TGCTCCACCCACAGGATGCT                         | Amplicons of 474 bp for                                      |
|                    | R: AACTGGCACC GCCGTTACT                         | identification of pCP20 plasmid recombinant strain           |
| pBAD24             | F: ATGCCATAGCATTTTATCC                          | Amplicons of 798 bp for                                      |
|                    | R: GATTTAATCTGTATCAGG                           | identification of complementing strain                       |

Table S2. RT-qPCR Primers used in this study.

| Genes       | Primer sequences (5'-3')     | Size (bp) |
|-------------|------------------------------|-----------|
| <i>16S</i>  | F: CGTGCTACAATGGCGTATACAGAGG | 125       |
|             | R: GCGATTACTAGCGATTCCGACTTCA |           |
| <i>vmh</i>  | F: CCTGAGTTATTGGTTGGTGGTACGG | 85        |
|             | R: CGCCAGAGGTCGCTGTGATAGA    |           |
| <i>tlh</i>  | F: CCACGGCAGCAACTGAACCAT     | 109       |
|             | R: GGACGATACCAACAGCGGACATAAG |           |
| <i>epsM</i> | F: TGCTTATCTGCAAGAGCGACAAGG  | 83        |
|             | R: TGACTTCCACCACGCCATTTACTTT |           |
| <i>epsL</i> | F: ACCTGCTTGCTGCTTCCGATTG    | 106       |
|             | R: CGCCACACTTGCTGTTCCTACTAA  |           |
| <i>epsI</i> | F: TCGTGAGGGTAGTGAGCAGATGG   | 82        |
|             | R: TTTGAGCAGATTGTCGGCGGTTT   |           |
| <i>epsG</i> | F: TGGCGGTTACATCAAGCGTCTG    | 108       |
|             | R: CCATCAGCACCTAGAGTGAACACAT |           |
| <i>epsF</i> | F: CAAGTATTGGCGGCGGCAGAA     | 118       |
|             | R: CACTCTGTTCACTACTGGCAATCA  |           |
| <i>epsE</i> | F: TTCCTCTTCACTGCTTGGCGTATTG | 95        |
|             | R: TGCCTTGCTCTTTGTCTGCTTCA   |           |
| <i>epsC</i> | F: GGACCTGACCGATCCGAATGTAATG | 100       |
|             | R: ATCATGTTGTTGACCATCACGCTCA |           |
| <i>epsD</i> | F: TCAATGCGGTGTCTAACGATTCCAA | 125       |
|             | R: TGCGGTTGAGCCAGTGATAACAG   |           |
| <i>vpsR</i> | F: GTACATGGTCGCTCGTGACACTC   | 88        |
|             | R: TGATGCGTTGCTGTTGGTATTGGA  |           |
| <i>vpsT</i> | F: GCTCACACGAAAGTTAGCCCAAGA  | 133       |
|             | R: CGATGCACCACTGCCGAGTAAC    |           |
| <i>rbmA</i> | F: GGTACATTCAACATGCGGCCAGTA  | 115       |
|             | R: GCTTTCAGTCAAAGGTCCAGAAGGT |           |
| <i>rbmA</i> | F: GCGGTATTGAGATGACCTCCTGTG  | 84        |
|             | R: TGTGCGTTCTGGTTATGCGATTGA  |           |
| <i>mshA</i> | F: GACTCACTACCAACCGCAGAGC    | 137       |
|             | R: GCAGATACATCAAGTACACCGCCAT |           |
| <i>flaA</i> | F: CAGCCGCTCGTGATCTGAAGTT    | 116       |
|             | R: ACCGTTGATGTAAGTCGCCAATTCT |           |
| <i>flrA</i> | F: CTTACGCCACGAGCAATCAATTC   | 96        |
|             | R: TACAGGATGACCATACGCTCAACCA |           |
| <i>flrC</i> | F: GACTGCCTACGCCAACATTCAAGA  | 150       |
|             | R: ACCACCGCATCACCATTGTCATC   |           |

|             |                                                             |     |
|-------------|-------------------------------------------------------------|-----|
| <i>fliA</i> | F: CCGATGCTGAAGTGGCGAAGTT<br>R: ACGGTGAAATTGCGTCATCAGAAAC   | 129 |
| <i>fliD</i> | F: TGAGTCCTGAAGAACGAGCCTACAT<br>R: GACGCCATCCAGCACAAACCAT   | 143 |
| <i>fliB</i> | F: GCGGATCAGTGATTTACAGCGTCTT<br>R: GCAGCAAGATTGGCGGCATACA   | 114 |
| <i>fliE</i> | F: GCACAGCAGTTCCACGAAGGTT<br>R: CGCCGTTACGAGTCAGCTCATT      | 133 |
| <i>fliH</i> | F: GGCACAGTTGATTGGTCACGAAGA<br>R: CAAGCGATAGTTGGTCAGGCACAA  | 104 |
| <i>fliB</i> | F: CCGTGATACTGACTATGCTCGTGAA<br>R: AGATGGTGACTGCTTCGCTTGC   | 103 |
| <i>acfD</i> | F: CCTGAATACGGCACCACTGAATAGC<br>R: ACCTCGGTAGCACCATCAACATTG | 96  |
| <i>ompU</i> | F: TCATCCGTGAGGCTGTCATTCAAG<br>R: TGGTCGCTTCAGTACCTGAGTTCA  | 150 |
| <i>hapA</i> | F: GTGTGAACGCCGCTTGTGGAA<br>R: CGCCGCTACCGTGAATGTATAGAA     | 123 |

Table S3. Biochemical test results.

| Biochemical test                               | SCCF01 | $\Delta crp$ |
|------------------------------------------------|--------|--------------|
| Ala-Phe-Pro-ARYLAMIDASE (APPA)                 | —      | —            |
| ADONITOL (ADO)                                 | —      | —            |
| L-Pyrrolydonyl-ARYLAMIDASE (PyrA)              | +      | +            |
| L-ARABITOL (IARL)                              | —      | —            |
| D-CELLOBIOSE (Dcel)                            | —      | —            |
| BETA-GALACTOSIDASE (BGAL)                      | +      | +            |
| H <sub>2</sub> S PRODUCTION (H <sub>2</sub> S) | —      | —            |
| BETA-N-ACETYL-GLUCOSAMINIDASE (BNAG)           | +      | +            |
| Glutamyl Arylamidase pNA (AGLTp)               | —      | —            |
| D-GLUCOSE (dGLU)                               | +      | +            |
| GAMMA-GLUTAMYL-TRANSFERASE (GGT)               | —      | —            |
| FERMENTATION/ GLUCOSE (OFF)                    | —      | —            |
| BETA-GLUCOSIDASE (BGLU)                        | —      | —            |
| D-MALTOSE (dMAL)                               | +      | —            |
| D-MANNITOL (dMAN)                              | +      | —            |
| D-MANNOSE (dMNE)                               | —      | —            |
| BETA-XYLOSIDASE (BXYL)                         | —      | —            |
| BETA-Alanine arylamidase pNA (BAlap)           | —      | —            |
| L-Proline ARYLAMIDASE (ProA)                   | —      | —            |
| LIPASE (LIP)                                   | —      | —            |

|                                           |   |   |
|-------------------------------------------|---|---|
| PALATINOSE (PLE)                          | — | — |
| Tyrosine ARYLAMIDASE (TyrA)               | + | — |
| UREASE (URE)                              | + | + |
| D-SORBITOL (dSOR)                         | — | — |
| SACCHAROSE/SUCROSE (SAC)                  | — | — |
| D-TAGATOSE (dTAG)                         | — | — |
| D-TREHALOSE (dTRE)                        | + | — |
| CITRATE(SODIUM) (CIT)                     | — | — |
| MALONATE (MNT)                            | — | — |
| 5-KETO-D-GLUCONATE (5KG)                  | — | — |
| L-LACTATE alkanisation (ILATk)            | + | — |
| ALPHA-GLUCOSIDASE (AGLU)                  | — | — |
| SUCCINATE alkanisation (SUCT)             | + | — |
| Beta-N-ACETYL-GALACTOSAMINIDASE<br>(NAGA) | + | — |
| ALPHA-GALACTOSIDASE (AGAL)                | — | — |
| PHOSPHATASE (PHOS)                        | + | — |
| Glycine ARYLAMIDASE (GlyA)                | — | + |
| ORNITHINE DECARBOXYLASE (ODC)             | + | — |
| LYSINE DECARBOXYLASE (LDC)                | + | — |
| L-HISTIDINE assimilation (IHISa)          | — | — |
| COURMARATE (CMT)                          | — | + |
| BETA-GLUCORONIDASE (BGUR)                 | — | — |
| O/129 RESISTANCE (O129R)                  | — | — |
| Glu-Gly-Arg-ARYLAMIDASE (GGAA)            | + | — |
| L-MALATE assimilation (IMLTa)             | — | — |
| ELLMAN (ELLM)                             | + | + |
| L-LACTATE assimilation (ILATa)            | — | — |
